# Supplementary figures and images for: Citrus Extract High in Flavonoids Beneficially Alters Intestinal Metabolic Responses in Subjects with Features of Metabolic Syndrome
Source: MDPI journal article supplement (doi:10.3390/foods12183413), 2023-09-13

## Supplementary Materials

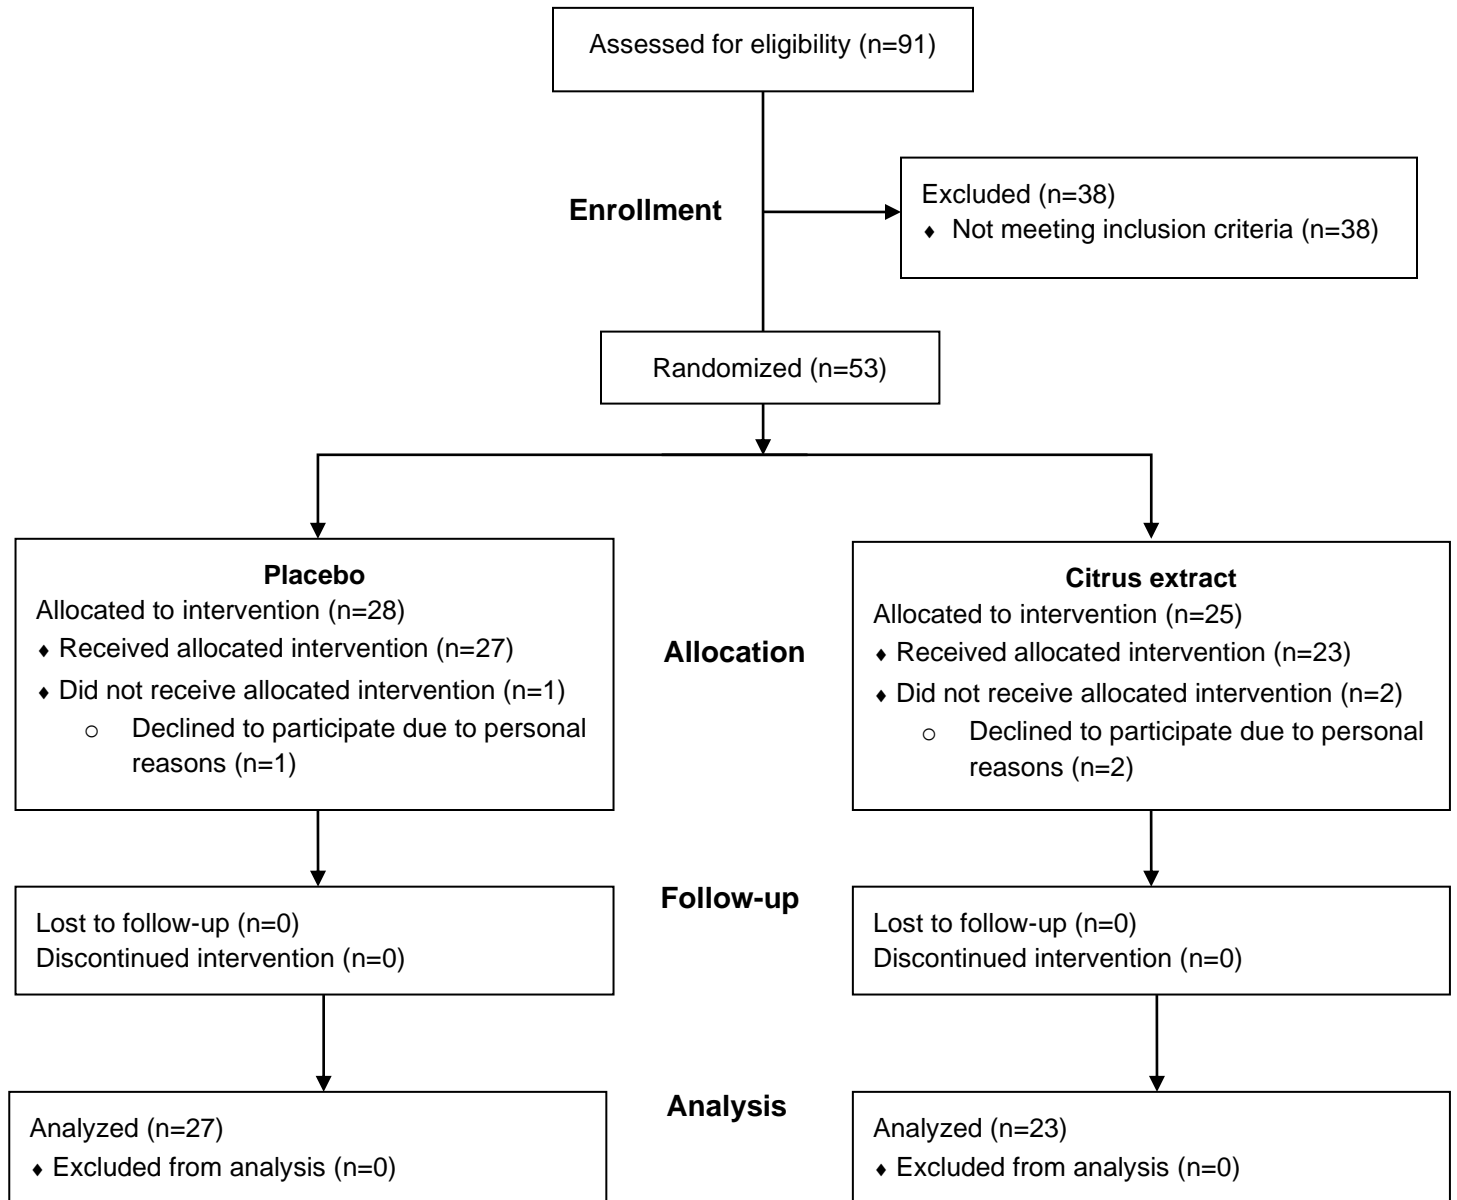

Figure S1. Consort flow chart

Supplement: s1 [file s1]
